# Supplementary material
Source: PubMed Central journal article supplement (PMC470735)
Supplement: pnas_101_26_9683__1.pdf [file pnas_101_26_9683__1.pdf]

**Table 3. MS analysis**

| Group 1                              | Accession nos.     | Group 2                                     | Accession nos. |
|--------------------------------------|--------------------|---------------------------------------------|----------------|
|                                      | Targeting/adhesion |                                             |                |
| <b>MFG-E8, lactadherin</b>           | 4586464            | CD39-like                                   | 12832618       |
| Tenascin precursor                   | 91806              |                                             |                |
|                                      |                    | Phosphatidyl ethanolamine-                  |                |
| Thrombospondin 1                     | 567240             | binding protein                             | 29840839       |
| <b>Intergin <math>\beta</math>1</b>  | 20887691           | <b>Integrin <math>\alpha</math>V (CD51)</b> | 6680486        |
| <b>Integrin <math>\alpha</math>3</b> | 7305189            |                                             |                |
| <b>Integrin <math>\alpha</math>7</b> | 12643785           |                                             |                |
| Del 1 major slice variant            | 2623894            |                                             |                |
| Osteoblast specific factor 2         | 7657429            |                                             |                |
|                                      | Chaperones         |                                             |                |
| <b>hsc70</b>                         | 13624307           |                                             |                |
| <b>hsp84</b>                         | 27681923           |                                             |                |
|                                      | Membrane fusions   |                                             |                |
| <b>Annexin A1</b>                    | 6754570            | <b>Annexin A6</b>                           | 113963         |
| <b>Annexin A2</b>                    | 6996913            | Annexin A11                                 | 15277556       |
| Annexin A3                           | 7304887            |                                             |                |
| <b>Annexin A4</b>                    | 7304889            |                                             |                |
| <b>Annexin A5</b>                    | 6753060            |                                             |                |
| <b>arf3</b>                          | 4502203            | <b>arf5</b>                                 | 4502209        |
| <b>arf6</b>                          | 4502211            |                                             |                |
| rab5c                                | 13096181           | rab1A                                       | 4758988        |
| rab7                                 | 6679599            | rab11B                                      | 6679583        |
| rab10                                | 12843097           | v-ral                                       | 31560414       |
| RabGDI                               | 6679987            | Harvey rat sarcoma oncogen                  | 6677819        |
| Ran                                  | 12832758           | Rho                                         | 4757764        |
| <b>RAP1A</b>                         | 4506413            | arp2/3                                      | 9790141        |
| rap2B                                | 13386338           | cdc42                                       | 4757952        |
| Profilin                             | 6755040            | Cyclohpilin C                               | 1000033        |

| Group 1                                      | Accession nos. | Group 2                       | Accession nos. |
|----------------------------------------------|----------------|-------------------------------|----------------|
| Targeting/adhesion                           |                |                               |                |
| Cyclophilin A                                | 12846244       |                               |                |
| Cytoskeleton                                 |                |                               |                |
| <b>β-Actin</b>                               | 49868          | Myosin light chain            | 2842632        |
|                                              | 4501887        |                               |                |
|                                              | 6752952        |                               |                |
| <b>γ-Actin</b>                               | 809561         | Vimentin                      | 281012         |
| Actinin α4                                   | 11230802       |                               |                |
| <b>Cofilin 1</b>                             | 6680924        |                               |                |
| <b>Moesin</b>                                | 462608         |                               |                |
| <b>Tubulin α1</b>                            | 6755901        | <b>Tubulin α6</b>             | 6678469        |
| <b>Tubulin α2</b>                            | 135412         |                               |                |
| <b>Tubulin β3</b>                            | 12963615       |                               |                |
| <b>Tubulin β5</b>                            | 12846758       |                               |                |
| Signal transduction                          |                |                               |                |
| <b>14-3-3 ζ</b>                              | 7435027        | Gsα, GNAS                     | 71887          |
| <b>14-3-3 γ</b>                              | 3065929        | Gαq                           | 6680039        |
| <b>14-3-3 ε</b>                              | 5803225        | <b>Gi2α</b>                   | 9489054        |
| <b>enolase 1</b>                             | 12963491       | <b>Gβ1</b>                    | 6680045        |
| Chloride intracell channel                   | 15617203       | Gα13                          | 12848236       |
| Profilin 1                                   | 6755040        |                               |                |
| Insulin-like growth factor-binding protein 5 | 5815459        |                               |                |
| Serine proteinase inhibitor                  | 6679373        |                               |                |
| Enzymes                                      |                |                               |                |
| Phosphoglycerate kinase 1                    | 6679291        | <b>Pyruvate kinase</b>        | 12741633       |
| Transitional endoplasmic reticulum ATPase    | 400712         | Phosphoglycerate mutase       | 20823772       |
| Lactate deshydrogenase                       | 6754524        | Aldehyde reductase            | 2117448        |
|                                              |                | Phosposerine aminotransférase | 20886743       |

| Group 1                                         | Accession nos.     | Group 2                       | Accession nos. |
|-------------------------------------------------|--------------------|-------------------------------|----------------|
|                                                 | Targeting/adhesion |                               |                |
|                                                 |                    | Adenosylhomocystéinase        | 21431841       |
|                                                 |                    | Farnesyl diphosphate synthase | 19882207       |
|                                                 |                    | <b>GAPDH</b>                  | 6679937        |
|                                                 |                    | Triosphosphate isomerase      | 12846508       |
|                                                 | Histones           |                               |                |
|                                                 | 20889715           |                               |                |
| <b>H2B</b>                                      | 280961             |                               |                |
|                                                 | 10800130           |                               |                |
| <b>H2A</b>                                      | 631691             |                               |                |
| <b>H4</b>                                       | 4504301            |                               |                |
|                                                 | Others             |                               |                |
| <b>Eukariotic translation</b>                   |                    | Pigment epithelium-derived    | 3183116        |
| <b>elongation factor 1 <math>\alpha</math>1</b> | 28460696           | factor                        |                |
| $\alpha$ -Fetoprotein                           | 191765             | <b>C3</b>                     | 23956044       |
| Solute carrier 25 NT                            | 22094075           | Ribosomal protein S3          | 6755372        |
| Solute carrier family 3                         | 6678850            | Hemoglobin epsilon            | 122728         |
| Albumin                                         |                    | $\alpha$ 1-Macroglobulin      | 6680608        |
| Peroxiredoxin                                   | 3603241            | Proteasome 20S                | 8394063        |
|                                                 |                    | <b>lamp2</b>                  | 6754502        |
|                                                 |                    | Programmed cell death 6       | 6755000        |

MS/MS analysis was used to identify the proteins. Group 1 proteins have three or more peptides matching the sequence. Group 2 proteins have two peptides matching the sequence. Classification was made on putative role of proteins according to They *et al.* (1). Proteins common to exosomes from different cell types are indicated in bold. Also shown are the NCBI nr accession nos. for each protein.

1. They, C., Zitvogel, L. & Amigorena, S. (2002) *Nat. Rev. Immunol.* **2**, 569-579.
